# Supplementary material
Source: ML conference proceedings conference paper supplement (https://proceedings.mlr.press/v97/wang19i.html)
Supplement: Supplementary file [file wang19i-supp.pdf]

## A. Proof of Theorem 1

The proof of Theorem 1 is inspired by [Sinha et al. \(2018\)](#). Before we prove this theorem, we need the following two technical lemmas.

**Lemma 1.** *Under Assumptions 1 and 2, we have  $L_S(\boldsymbol{\theta})$  is  $L$ -smooth where  $L = L_{\theta x}L_{x\theta}/\mu + L_{\theta\theta}$ , i.e., for any  $\boldsymbol{\theta}_1$  and  $\boldsymbol{\theta}_2$ , it holds*

$$\begin{aligned} L_S(\boldsymbol{\theta}_1) &\leq L_S(\boldsymbol{\theta}_2) + \langle \nabla L_S(\boldsymbol{\theta}_2), \boldsymbol{\theta}_1 - \boldsymbol{\theta}_2 \rangle + \frac{L}{2} \|\boldsymbol{\theta}_1 - \boldsymbol{\theta}_2\|_2^2, \\ \|\nabla L_S(\boldsymbol{\theta}_1) - \nabla L_S(\boldsymbol{\theta}_2)\|_2 &\leq L \|\boldsymbol{\theta}_1 - \boldsymbol{\theta}_2\|_2 \end{aligned}$$

*Proof.* By Assumption 2, we have for any  $\boldsymbol{\theta}_1, \boldsymbol{\theta}_2$ , and  $\mathbf{x}_i^*(\boldsymbol{\theta}_1), \mathbf{x}_i^*(\boldsymbol{\theta}_2)$ , we have

$$\begin{aligned} f(\boldsymbol{\theta}_2, \mathbf{x}_i^*(\boldsymbol{\theta}_1)) &\leq f(\boldsymbol{\theta}_2, \mathbf{x}_i^*(\boldsymbol{\theta}_2)) + \langle \nabla_{\mathbf{x}} f(\boldsymbol{\theta}_2, \mathbf{x}_i^*(\boldsymbol{\theta}_2)), \mathbf{x}_i^*(\boldsymbol{\theta}_1) - \mathbf{x}_i^*(\boldsymbol{\theta}_2) \rangle - \frac{\mu}{2} \|\mathbf{x}_i^*(\boldsymbol{\theta}_1) - \mathbf{x}_i^*(\boldsymbol{\theta}_2)\|_2^2 \\ &\leq f(\boldsymbol{\theta}_2, \mathbf{x}_i^*(\boldsymbol{\theta}_2)) - \frac{\mu}{2} \|\mathbf{x}_i^*(\boldsymbol{\theta}_1) - \mathbf{x}_i^*(\boldsymbol{\theta}_2)\|_2^2, \end{aligned} \quad (6)$$

where the inequality follows from  $\langle \nabla_{\mathbf{x}} f(\boldsymbol{\theta}_2, \mathbf{x}_i^*(\boldsymbol{\theta}_2)), \mathbf{x}_i^*(\boldsymbol{\theta}_1) - \mathbf{x}_i^*(\boldsymbol{\theta}_2) \rangle \leq 0$ . In addition, we have

$$f(\boldsymbol{\theta}_2, \mathbf{x}_i^*(\boldsymbol{\theta}_2)) \leq f(\boldsymbol{\theta}_2, \mathbf{x}_i^*(\boldsymbol{\theta}_1)) + \langle \nabla_{\mathbf{x}} f(\boldsymbol{\theta}_2, \mathbf{x}_i^*(\boldsymbol{\theta}_1)), \mathbf{x}_i^*(\boldsymbol{\theta}_2) - \mathbf{x}_i^*(\boldsymbol{\theta}_1) \rangle - \frac{\mu}{2} \|\mathbf{x}_i^*(\boldsymbol{\theta}_1) - \mathbf{x}_i^*(\boldsymbol{\theta}_2)\|_2^2 \quad (7)$$

Combining (6) and (7), we obtain

$$\begin{aligned} \mu \|\mathbf{x}_i^*(\boldsymbol{\theta}_1) - \mathbf{x}_i^*(\boldsymbol{\theta}_2)\|_2^2 &\leq \langle \nabla_{\mathbf{x}} f(\boldsymbol{\theta}_2, \mathbf{x}_i^*(\boldsymbol{\theta}_1)), \mathbf{x}_i^*(\boldsymbol{\theta}_2) - \mathbf{x}_i^*(\boldsymbol{\theta}_1) \rangle \\ &\leq \langle \nabla_{\mathbf{x}} f(\boldsymbol{\theta}_2, \mathbf{x}_i^*(\boldsymbol{\theta}_1)) - \nabla_{\mathbf{x}} f(\boldsymbol{\theta}_1, \mathbf{x}_i^*(\boldsymbol{\theta}_1)), \mathbf{x}_i^*(\boldsymbol{\theta}_2) - \mathbf{x}_i^*(\boldsymbol{\theta}_1) \rangle \\ &\leq \|\nabla_{\mathbf{x}} f(\boldsymbol{\theta}_2, \mathbf{x}_i^*(\boldsymbol{\theta}_1)) - \nabla_{\mathbf{x}} f(\boldsymbol{\theta}_1, \mathbf{x}_i^*(\boldsymbol{\theta}_1))\|_2 \|\mathbf{x}_i^*(\boldsymbol{\theta}_2) - \mathbf{x}_i^*(\boldsymbol{\theta}_1)\|_2 \\ &\leq L_{x\theta} \|\boldsymbol{\theta}_2 - \boldsymbol{\theta}_1\|_2 \|\mathbf{x}_i^*(\boldsymbol{\theta}_2) - \mathbf{x}_i^*(\boldsymbol{\theta}_1)\|_2 \end{aligned} \quad (8)$$

where the second inequality holds because  $\langle \nabla_{\mathbf{x}} f(\boldsymbol{\theta}_1, \mathbf{x}_i^*(\boldsymbol{\theta}_1)), \mathbf{x}_i^*(\boldsymbol{\theta}_2) - \mathbf{x}_i^*(\boldsymbol{\theta}_1) \rangle \leq 0$ , the third inequality follows from CauchySchwarz inequality, and the last inequality holds due to Assumption 1. (8) immediately yields

$$\|\mathbf{x}_i^*(\boldsymbol{\theta}_1) - \mathbf{x}_i^*(\boldsymbol{\theta}_2)\|_2 \leq \frac{L_{x\theta}}{\mu} \|\boldsymbol{\theta}_2 - \boldsymbol{\theta}_1\|_2. \quad (9)$$

Then we have for  $i \in [n]$ ,

$$\begin{aligned} \|\nabla_{\boldsymbol{\theta}} f(\boldsymbol{\theta}_1, \mathbf{x}_i^*(\boldsymbol{\theta}_1)) - \nabla_{\boldsymbol{\theta}} f(\boldsymbol{\theta}_2, \mathbf{x}_i^*(\boldsymbol{\theta}_2))\|_2 &\leq \|\nabla_{\boldsymbol{\theta}} f(\boldsymbol{\theta}_1, \mathbf{x}_i^*(\boldsymbol{\theta}_1)) - \nabla_{\boldsymbol{\theta}} f(\boldsymbol{\theta}_1, \mathbf{x}_i^*(\boldsymbol{\theta}_2))\|_2 \\ &\quad + \|\nabla_{\boldsymbol{\theta}} f(\boldsymbol{\theta}_1, \mathbf{x}_i^*(\boldsymbol{\theta}_2)) - \nabla_{\boldsymbol{\theta}} f(\boldsymbol{\theta}_2, \mathbf{x}_i^*(\boldsymbol{\theta}_2))\|_2 \\ &\leq L_{\theta x} \|\mathbf{x}_i^*(\boldsymbol{\theta}_1) - \mathbf{x}_i^*(\boldsymbol{\theta}_2)\|_2 + L_{\theta\theta} \|\boldsymbol{\theta}_1 - \boldsymbol{\theta}_2\|_2 \\ &= \left( \frac{L_{\theta x} L_{x\theta}}{\mu} + L_{\theta\theta} \right) \|\boldsymbol{\theta}_1 - \boldsymbol{\theta}_2\|_2 \end{aligned} \quad (10)$$

where the first inequality follows from triangle inequality, the second inequality holds due to Assumption 1, and the last inequality is due to (10). Finally, by the definition of  $L_S(\boldsymbol{\theta})$ , we have

$$\begin{aligned} \|\nabla L_S(\boldsymbol{\theta}_1) - \nabla L_S(\boldsymbol{\theta}_2)\|_2 &\leq \left\| \frac{1}{n} \sum_{i=1}^n \nabla_{\boldsymbol{\theta}} f(\boldsymbol{\theta}_1, \mathbf{x}_i^*(\boldsymbol{\theta}_1)) - \frac{1}{n} \sum_{i=1}^n \nabla_{\boldsymbol{\theta}} f(\boldsymbol{\theta}_2, \mathbf{x}_i^*(\boldsymbol{\theta}_2)) \right\|_2 \\ &\leq \frac{1}{n} \sum_{i=1}^n \|\nabla_{\boldsymbol{\theta}} f(\boldsymbol{\theta}_1, \mathbf{x}_i^*(\boldsymbol{\theta}_1)) - \nabla_{\boldsymbol{\theta}} f(\boldsymbol{\theta}_2, \mathbf{x}_i^*(\boldsymbol{\theta}_2))\|_2 \\ &\leq \left( \frac{L_{\theta x} L_{x\theta}}{\mu} + L_{\theta\theta} \right) \|\boldsymbol{\theta}_1 - \boldsymbol{\theta}_2\|_2, \end{aligned}$$

where the last inequality follows from (10). This completes the proof.  $\square$

**Lemma 2.** Under Assumptions 1 and 2, the approximate stochastic gradient  $\hat{\mathbf{g}}(\theta)$  satisfies

$$\|\hat{\mathbf{g}}(\theta) - \mathbf{g}(\theta)\|_2 \leq L_{\theta x} \sqrt{\frac{\delta}{\mu}}. \quad (11)$$

*Proof.* We have

$$\begin{aligned} \|\hat{\mathbf{g}}(\theta) - \mathbf{g}(\theta)\|_2 &= \left\| \frac{1}{|\mathcal{B}|} \sum_{i \in \mathcal{B}} (\nabla_{\theta} f(\theta, \hat{\mathbf{x}}_i(\theta)) - \nabla_{\theta} \bar{f}_i(\theta)) \right\|_2 \\ &\leq \frac{1}{|\mathcal{B}|} \sum_{i \in \mathcal{B}} \|\nabla_{\theta} f(\theta, \hat{\mathbf{x}}_i(\theta)) - \nabla_{\theta} f(\theta, \mathbf{x}_i^*(\theta))\|_2 \\ &\leq \frac{1}{|\mathcal{B}|} \sum_{i \in \mathcal{B}} L_{\theta x} \|\hat{\mathbf{x}}_i(\theta) - \mathbf{x}_i^*(\theta)\|_2, \end{aligned} \quad (12)$$

where the first inequality follows from triangle inequality, and the second inequality holds due to Assumption 1. By Assumption 2, we have for any  $\theta$ , and  $\mathbf{x}_i^*(\theta)$ ,  $\hat{\mathbf{x}}_i(\theta)$ , we have

$$\mu \|\mathbf{x}_i^*(\theta) - \hat{\mathbf{x}}_i(\theta)\|_2^2 \leq \langle \nabla_{\mathbf{x}} f(\theta, \mathbf{x}_i^*(\theta)) - \nabla_{\mathbf{x}} f(\theta, \hat{\mathbf{x}}_i(\theta)), \hat{\mathbf{x}}_i(\theta) - \mathbf{x}_i^*(\theta) \rangle. \quad (13)$$

Since  $\hat{\mathbf{x}}_i(\theta)$  is a  $\delta$ -approximate maximizer of  $f(\theta, \hat{\mathbf{x}}_i(\theta))$ , we have

$$\langle \mathbf{x}_i^*(\theta) - \hat{\mathbf{x}}_i(\theta), \nabla_{\theta} f(\theta, \hat{\mathbf{x}}_i(\theta)) \rangle \leq \delta. \quad (14)$$

In addition, we have

$$\langle \hat{\mathbf{x}}_i(\theta) - \mathbf{x}_i^*(\theta), \nabla_{\mathbf{x}} f(\theta, \mathbf{x}_i^*(\theta)) \rangle \leq 0. \quad (15)$$

Combining (14) and (15) gives rise to

$$\langle \hat{\mathbf{x}}_i(\theta) - \mathbf{x}_i^*(\theta), \nabla_{\mathbf{x}} f(\theta, \mathbf{x}_i^*(\theta)) - \nabla_{\theta} f(\theta, \hat{\mathbf{x}}_i(\theta)) \rangle \leq \delta. \quad (16)$$

Substitute (16) into (13), we obtain

$$\mu \|\mathbf{x}_i^*(\theta) - \hat{\mathbf{x}}_i(\theta)\|_2^2 \leq \delta,$$

which immediately yields

$$\|\mathbf{x}_i^*(\theta) - \hat{\mathbf{x}}_i(\theta)\|_2 \leq \sqrt{\frac{\delta}{\mu}}. \quad (17)$$

Substitute (17) into (12), we obtain

$$\|\hat{\mathbf{g}}(\theta) - \mathbf{g}(\theta)\|_2 \leq L_{\theta x} \sqrt{\frac{\delta}{\mu}},$$

which completes the proof. □

Now we are ready to prove Theorem 1.

*Proof of Theorem 1.* Let  $\bar{f}(\boldsymbol{\theta}) = 1/n \sum_{i=1}^n \min_{\mathbf{x}_i} f(\boldsymbol{\theta}, \mathbf{x}_i) = 1/n \sum_{i=1}^n f(\boldsymbol{\theta}, \mathbf{x}_i^*)$ . By Lemma 1, we have

$$\begin{aligned}
 L_S(\boldsymbol{\theta}^{t+1}) &\leq L_S(\boldsymbol{\theta}^t) + \langle \nabla L_S(\boldsymbol{\theta}^t), \boldsymbol{\theta}^{t+1} - \boldsymbol{\theta}^t \rangle + \frac{L}{2} \|\boldsymbol{\theta}^{t+1} - \boldsymbol{\theta}^t\|_2^2 \\
 &= L_S(\boldsymbol{\theta}^t) - \eta_t \|\nabla L_S(\boldsymbol{\theta}^t)\|_2^2 + \frac{L\eta_t^2}{2} \|\hat{\mathbf{g}}(\boldsymbol{\theta}^t)\|_2^2 + \eta_t \langle \nabla L_S(\boldsymbol{\theta}^{t+1}), \nabla L_S(\boldsymbol{\theta}^{t+1}) - \hat{\mathbf{g}}(\boldsymbol{\theta}^t) \rangle \\
 &= L_S(\boldsymbol{\theta}^t) - \eta_t \left(1 - \frac{L\eta_t}{2}\right) \|\nabla L_S(\boldsymbol{\theta}^t)\|_2^2 + \eta_t \left(1 - \frac{L\eta_t}{2}\right) \langle \nabla L_S(\boldsymbol{\theta}^t), \nabla L_S(\boldsymbol{\theta}^t) - \hat{\mathbf{g}}(\boldsymbol{\theta}^t) \rangle \\
 &\quad + \frac{L\eta_t^2}{2} \|\hat{\mathbf{g}}(\boldsymbol{\theta}^t) - \nabla L_S(\boldsymbol{\theta}^t)\|_2^2 \\
 &= L_S(\boldsymbol{\theta}^t) - \eta_t \left(1 - \frac{L\eta_t}{2}\right) \|\nabla L_S(\boldsymbol{\theta}^t)\|_2^2 + \eta_t \left(1 - \frac{L\eta_t}{2}\right) \langle \nabla L_S(\boldsymbol{\theta}^t), \mathbf{g}(\boldsymbol{\theta}^t) - \hat{\mathbf{g}}(\boldsymbol{\theta}^t) \rangle \\
 &\quad + \eta_t \left(1 - \frac{L\eta_t}{2}\right) \langle \nabla L_S(\boldsymbol{\theta}^t), \nabla L_S(\boldsymbol{\theta}^t) - \mathbf{g}(\boldsymbol{\theta}^t) \rangle + \frac{L\eta_t^2}{2} \|\hat{\mathbf{g}}(\boldsymbol{\theta}^t) - \mathbf{g}(\boldsymbol{\theta}^t) + \mathbf{g}(\boldsymbol{\theta}^t) - \nabla L_S(\boldsymbol{\theta}^t)\|_2^2 \\
 &\leq L_S(\boldsymbol{\theta}^t) - \frac{\eta_t}{2} \left(1 - \frac{L\eta_t}{2}\right) \|\nabla L_S(\boldsymbol{\theta}^t)\|_2^2 + \frac{\eta_t}{2} \left(1 - \frac{L\eta_t}{2}\right) \|\hat{\mathbf{g}}(\boldsymbol{\theta}^t) - \mathbf{g}(\boldsymbol{\theta}^t)\|_2^2 \\
 &\quad + \eta_t \left(1 + \frac{L\eta_t}{2}\right) \langle \nabla L_S(\boldsymbol{\theta}^t), \nabla L_S(\boldsymbol{\theta}^t) - \mathbf{g}(\boldsymbol{\theta}^t) \rangle + L\eta_t^2 (\|\hat{\mathbf{g}}(\boldsymbol{\theta}^t) - \mathbf{g}(\boldsymbol{\theta}^t)\|_2^2 + \|\mathbf{g}(\boldsymbol{\theta}^t) - \nabla L_S(\boldsymbol{\theta}^t)\|_2^2)
 \end{aligned}$$

Taking expectation on both sides of the above inequality conditioned on  $\boldsymbol{\theta}^t$ , we have

$$\mathbb{E}[L_S(\boldsymbol{\theta}^{t+1}) - L_S(\boldsymbol{\theta}^t) | \boldsymbol{\theta}^t] \leq -\frac{\eta_t}{2} \left(1 - \frac{L\eta_t}{2}\right) \|\nabla L_S(\boldsymbol{\theta}^t)\|_2^2 + \frac{\eta_t}{2} \left(1 + \frac{3L\eta_t}{2}\right) \frac{L_{\theta_x}^2 \delta}{\mu} + L\eta_t^2 \sigma^2 \quad (18)$$

where we used the fact that  $\mathbb{E}[\mathbf{g}(\boldsymbol{\theta}^t)] = \nabla L_S(\boldsymbol{\theta}^t)$ , Assumption 3, and Lemma 2. Taking telescope sum of (18) over  $t = 0, \dots, T-1$ , we obtain that

$$\sum_{t=0}^{T-1} \frac{\eta_t}{2} \left(1 - \frac{L\eta_t}{2}\right) \mathbb{E}[\|\nabla L_S(\boldsymbol{\theta}^t)\|_2^2] \leq \mathbb{E}[L_S(\boldsymbol{\theta}^0) - L_S(\boldsymbol{\theta}^T)] + \sum_{t=0}^{T-1} \frac{\eta_t}{2} \left(1 + \frac{3L\eta_t}{2}\right) \frac{L_{\theta_x}^2 \delta}{\mu} + L \sum_{t=0}^{T-1} \eta_t^2 \sigma^2$$

Choose  $\eta_t = \eta = \min(1/L, \sqrt{\Delta/TL\sigma^2})$  where  $L = L_{\theta_x} L_{x\theta}/\mu + L_{\theta\theta}$ , we can show that

$$\frac{1}{T} \sum_{t=0}^{T-1} \mathbb{E}[\|\nabla L_S(\boldsymbol{\theta}^t)\|_2^2] \leq 4\sigma \sqrt{\frac{L\Delta}{T}} + \frac{5L_{\theta_x}^2 \delta}{\mu}.$$

This completes the proof.  $\square$
